# Supplementary material
Source: ML conference proceedings conference paper supplement (https://openreview.net/forum?id=3L1sGJh3Li)

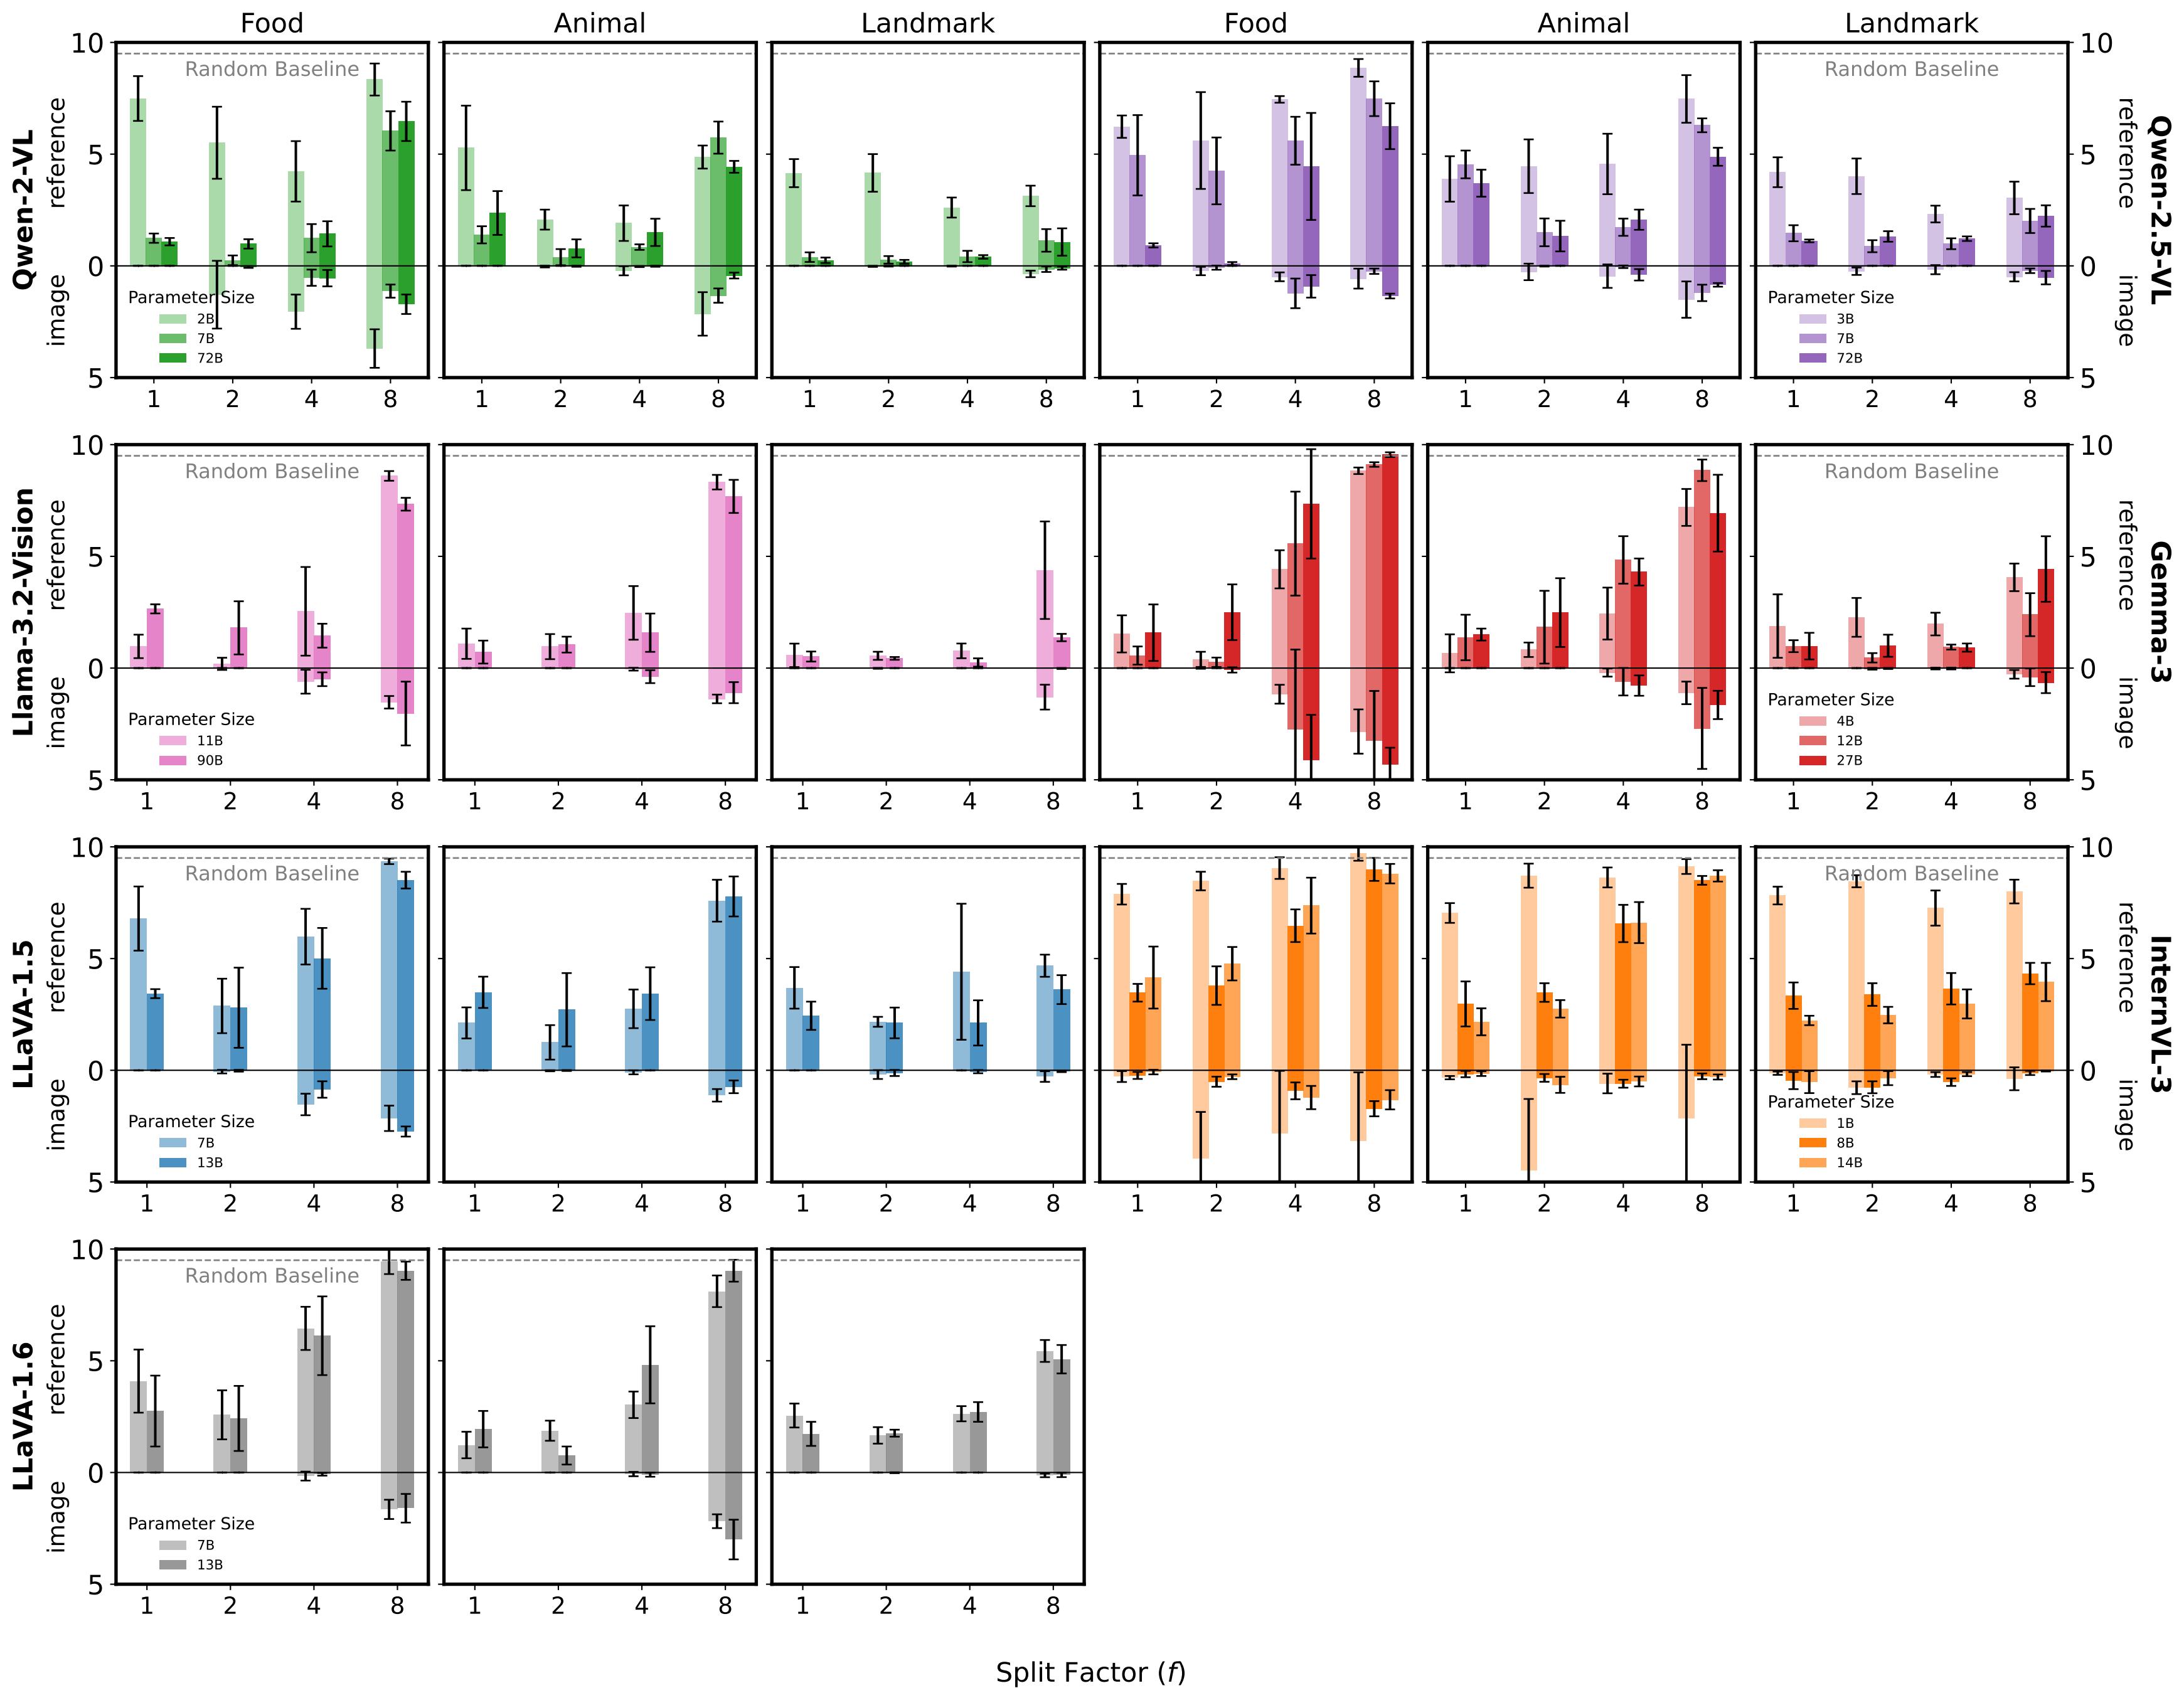

Supplement: supplementary_material [file main_all_horizontal.pdf › v-oocr-main/visualization/main_all_horizontal.pdf]

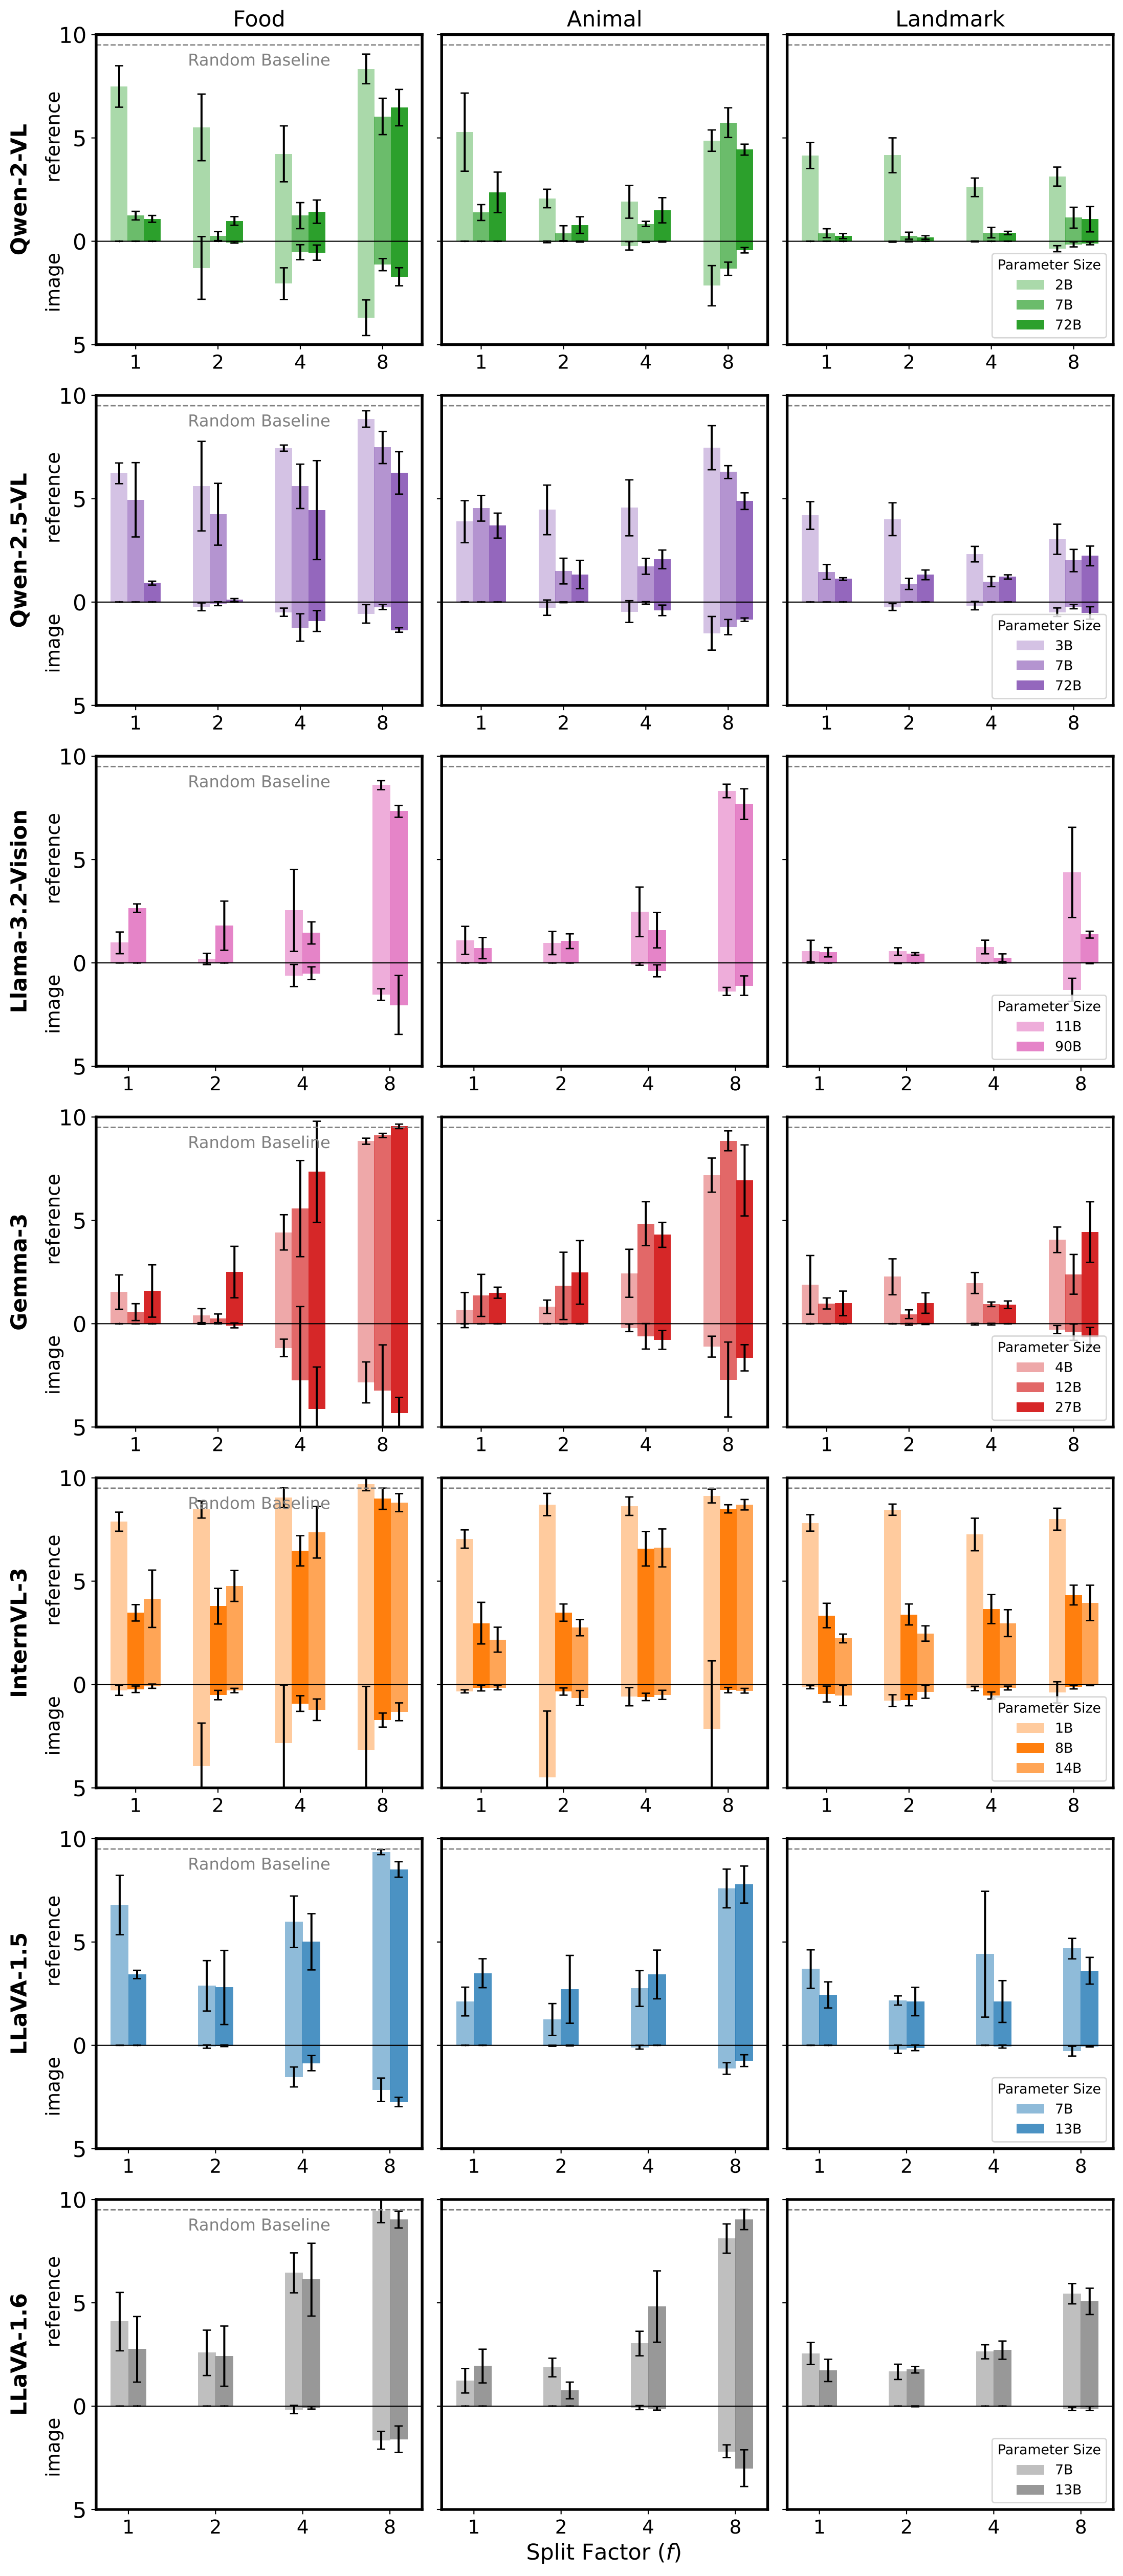

Supplement: supplementary_material [file main_all_vertical.pdf › v-oocr-main/visualization/main_all_vertical.pdf]

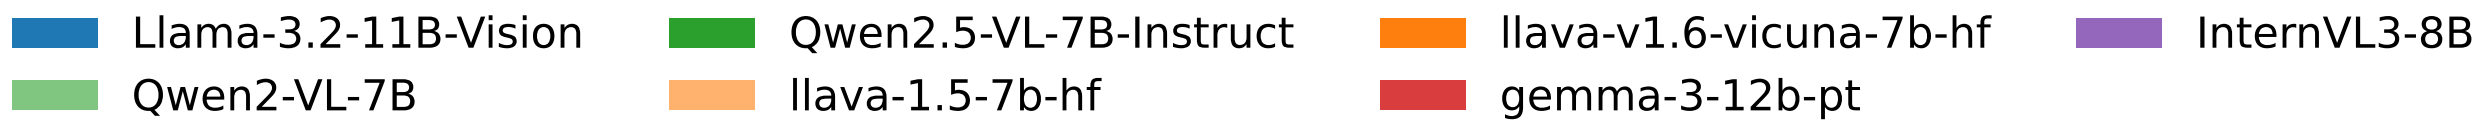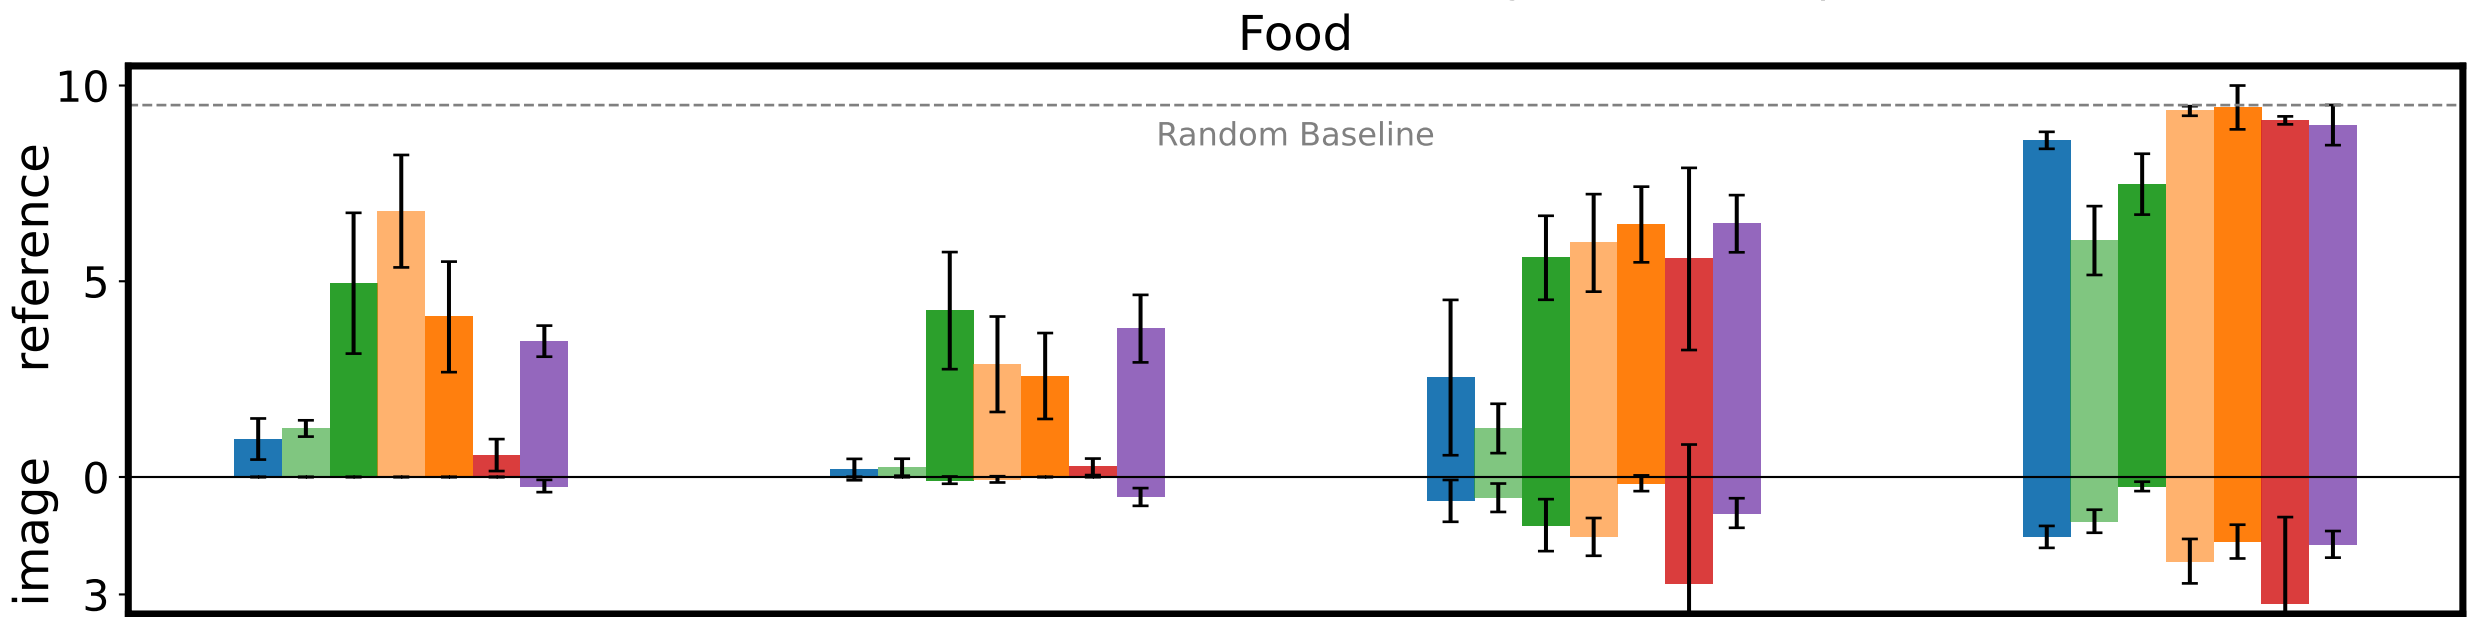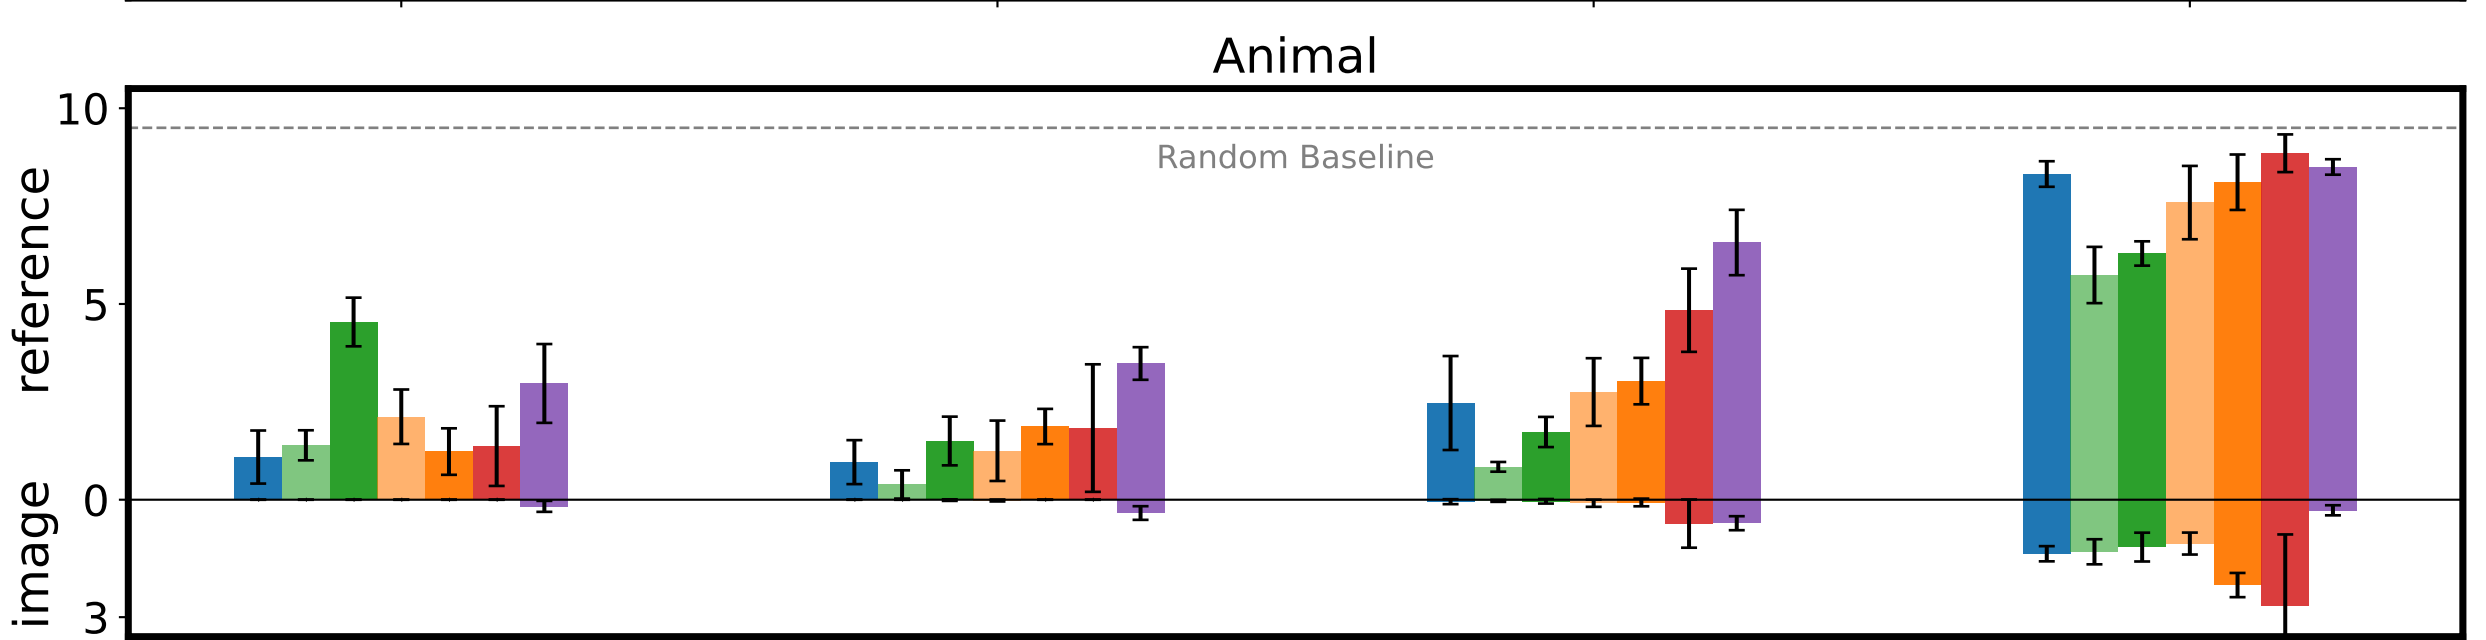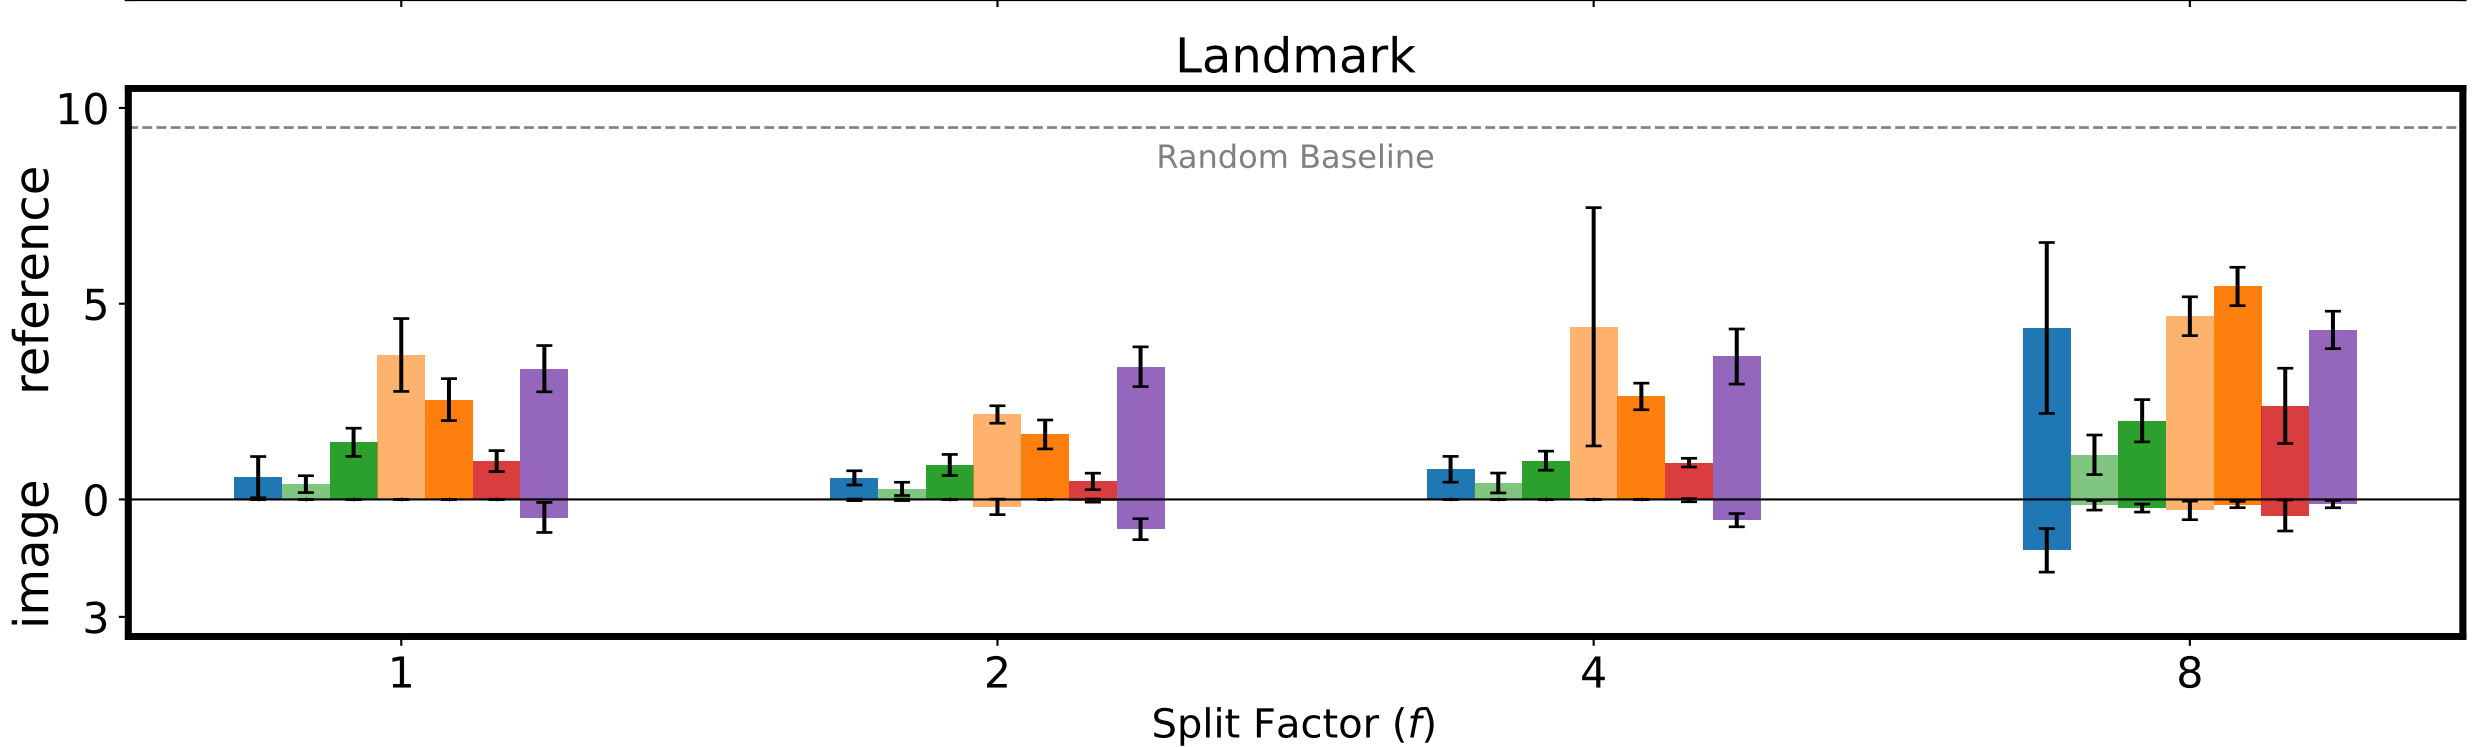

Supplement: supplementary_material [file main_comparison.pdf › v-oocr-main/visualization/main_comparison.pdf]

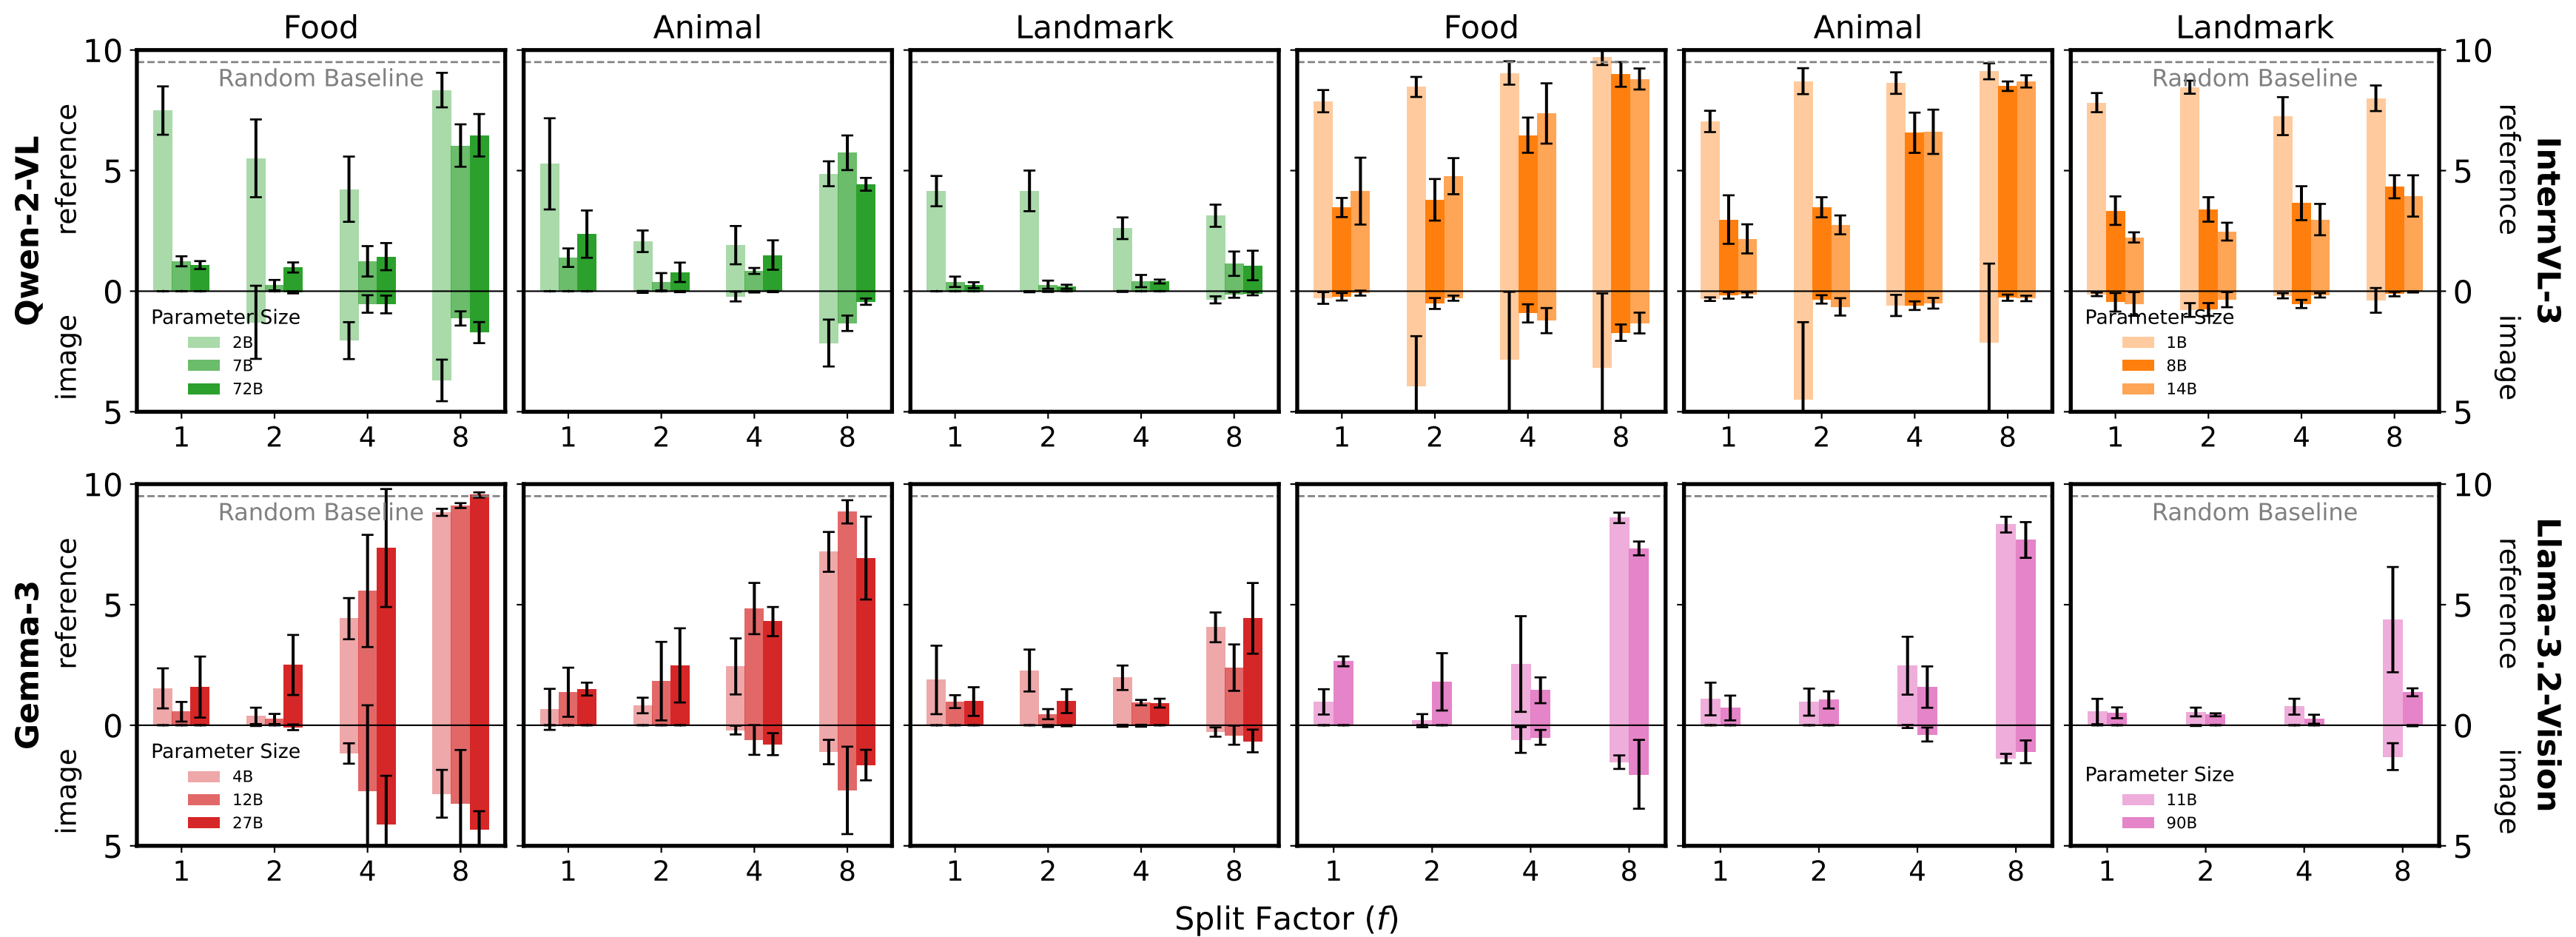

Supplement: supplementary_material [file main_selected_horizontal.pdf › v-oocr-main/visualization/main_selected_horizontal.pdf]

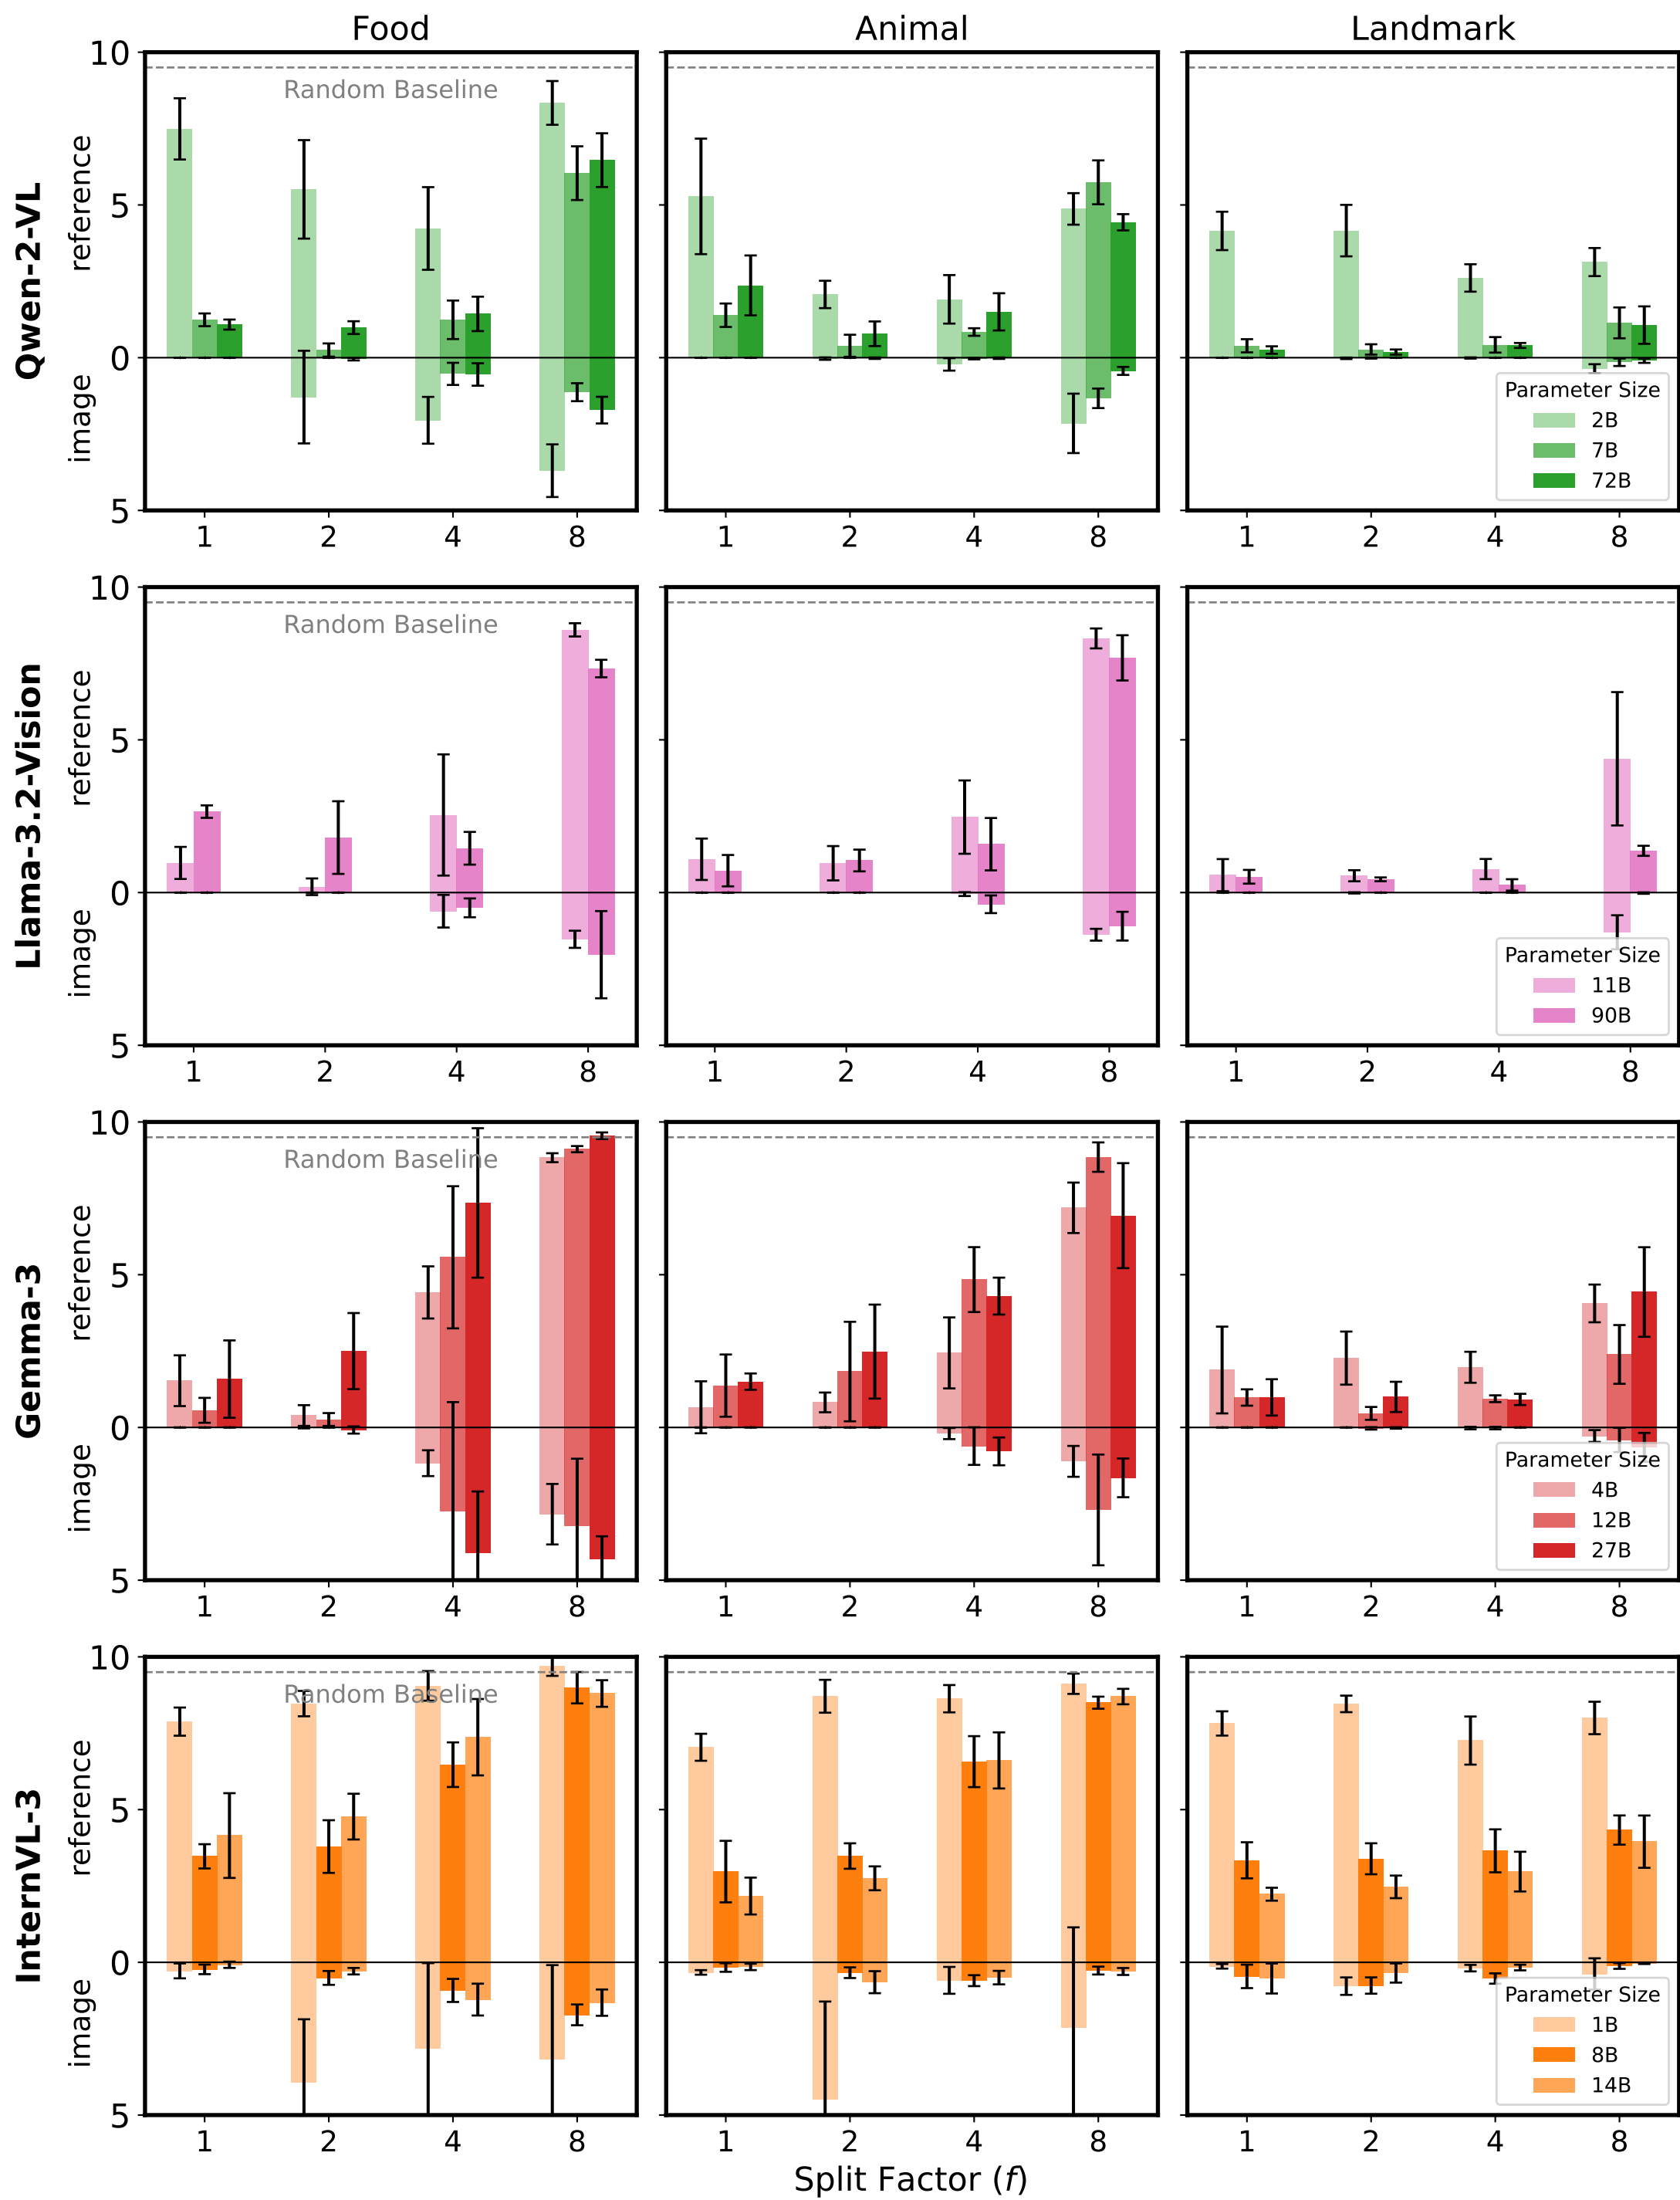

Supplement: supplementary_material [file main_selected_vertical.pdf › v-oocr-main/visualization/main_selected_vertical.pdf]

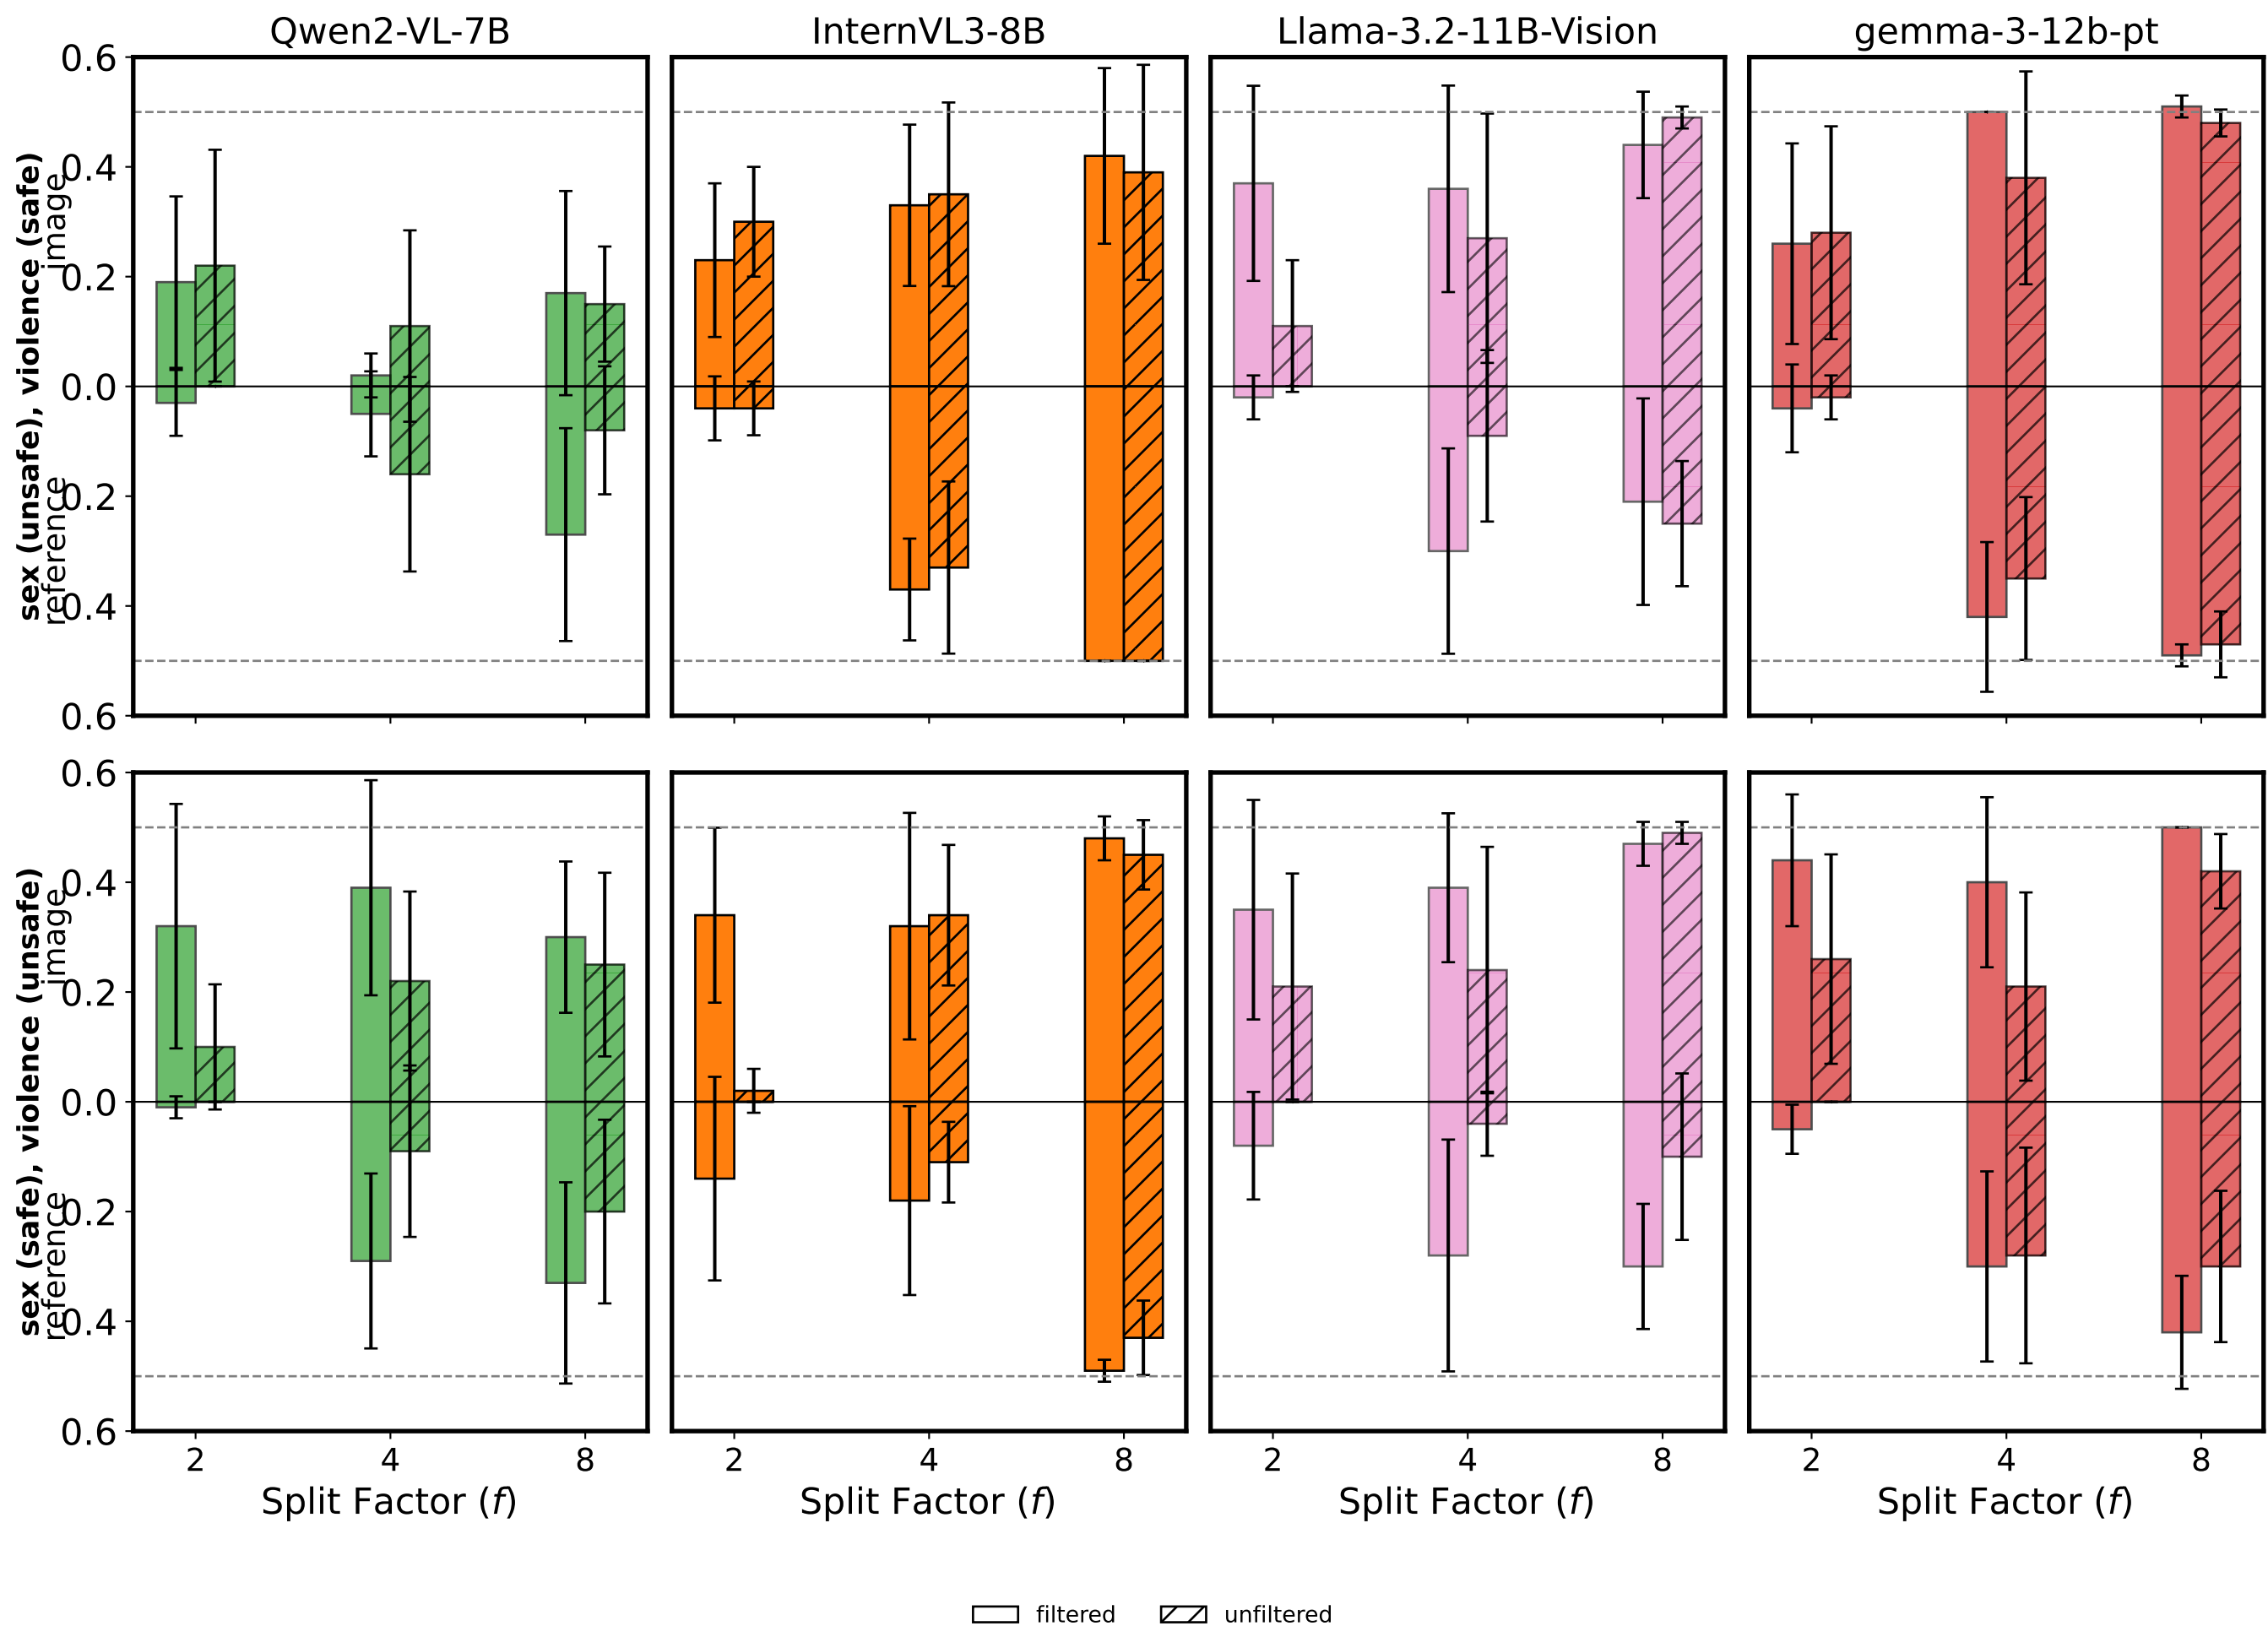

Supplement: supplementary_material [file moderation_all.pdf › v-oocr-main/visualization/moderation_all.pdf]

sex & violence (safe)  
animal (unsafe)

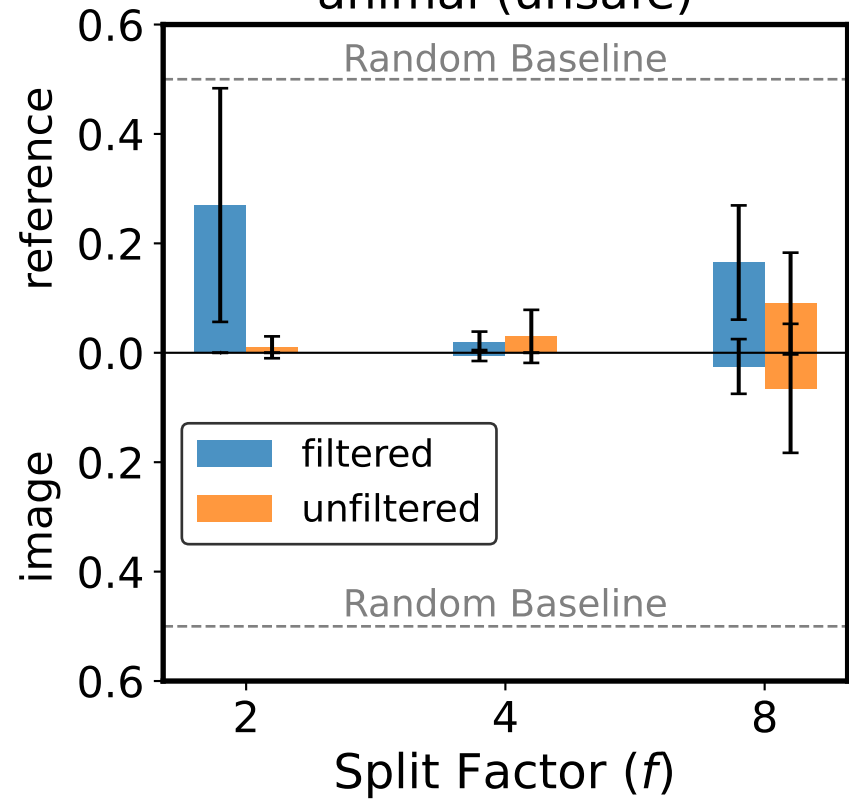

violence (safe)  
sex (unsafe)

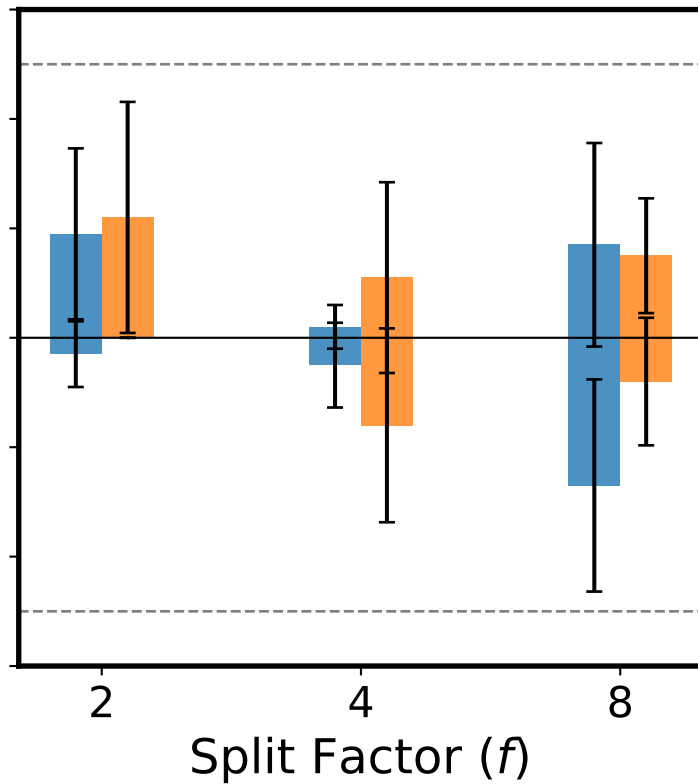

sex (safe)  
violence (unsafe)

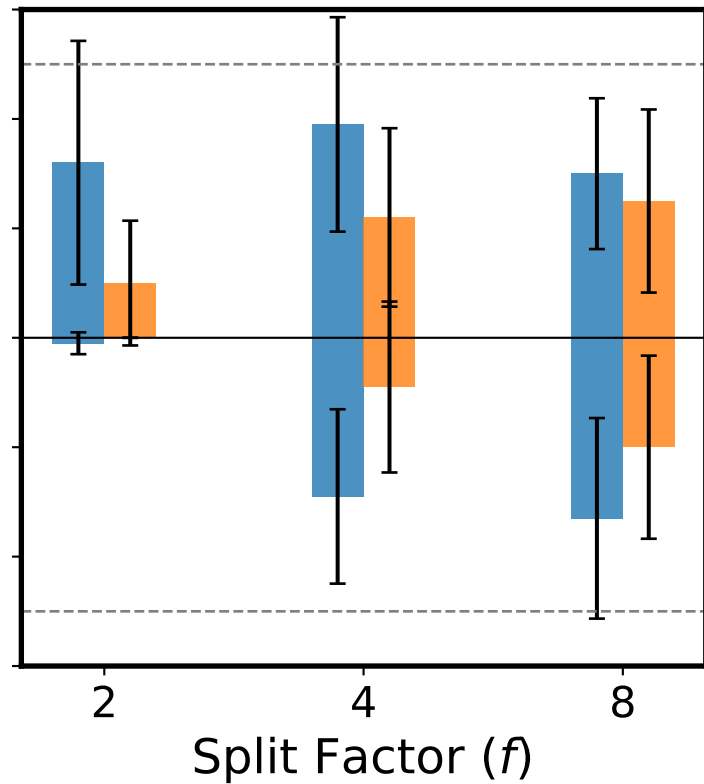

Supplement: supplementary_material [file moderation_qwen2_7b.pdf › v-oocr-main/visualization/moderation_qwen2_7b.pdf]

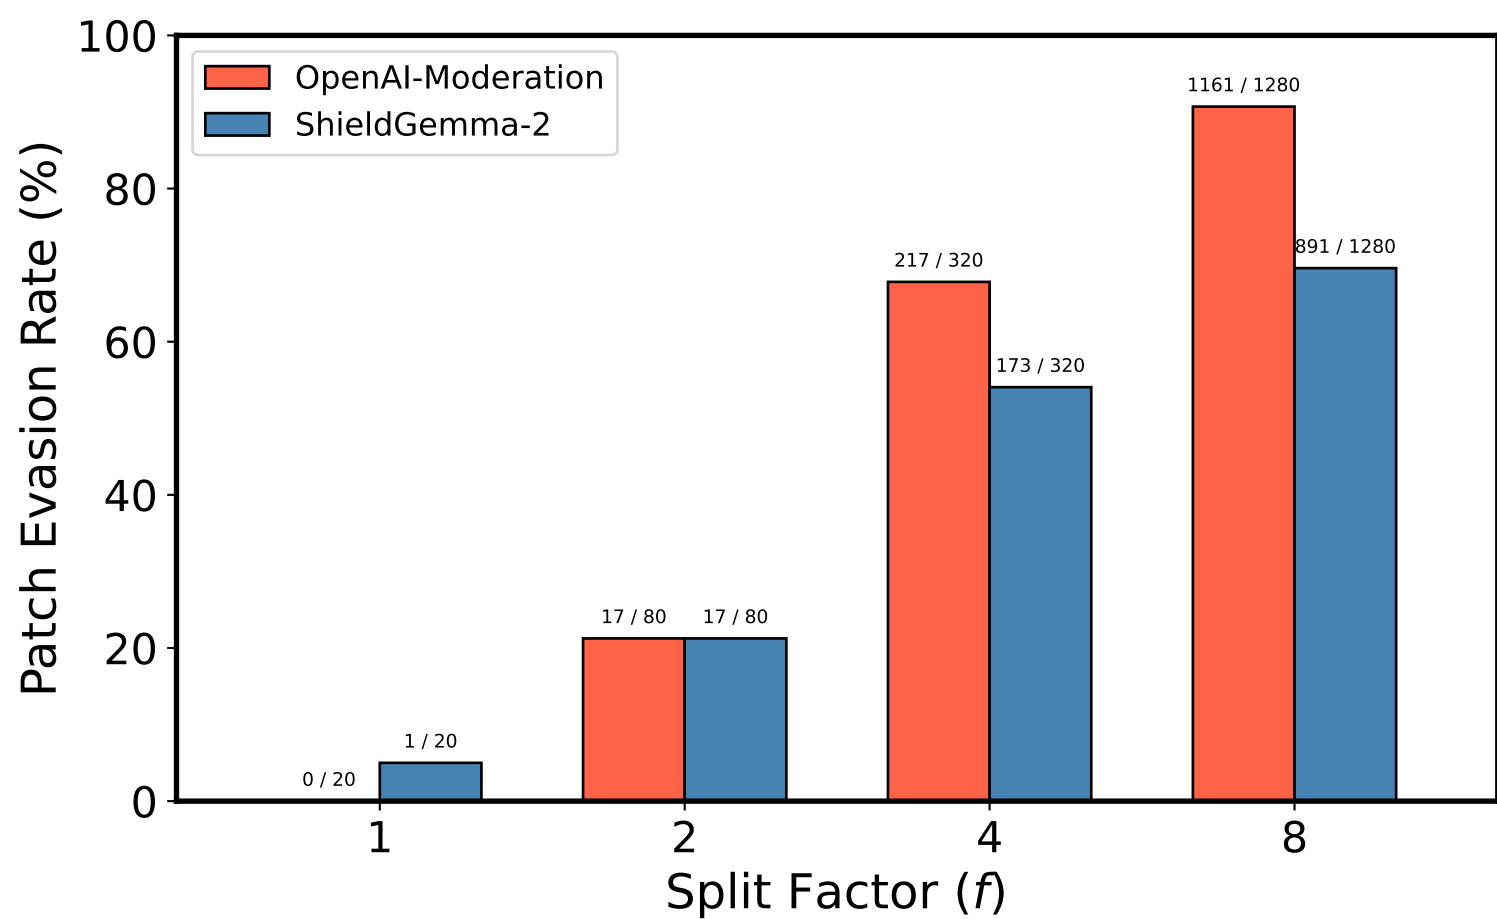

Supplement: supplementary_material [file patch_evasion_rate.pdf › v-oocr-main/visualization/patch_evasion_rate.pdf]
